# Supplementary material for: Papillary-Muscle-Derived Radiomic Features for Hypertrophic Cardiomyopathy versus Hypertensive Heart Disease Classification
Source: MDPI journal article supplement (doi:10.3390/diagnostics13091544), 2023-04-25
Supplement: s1 [file s1]

**Myocardium and papillary muscle derived radiomic features for left ventricular hypertrophy detection and hypertrophic cardiomyopathy versus hypertensive heart disease classification**

**Supplementary Materials**

|                       |            |
|-----------------------|------------|
| Supplementary methods | Page 2     |
| Supplementary figures | Pages 4-5  |
| Supplementary tables  | Pages 6-12 |
| Reference             | Page 13    |

## **Supplementary methods**

### **Image processing**

Image processing and feature extraction were performed with Pyradiomics library (version 3.0.1) in a Python environment (version 3.7.10) in compliance with the latest image biomarker standardisation initiative (IBSI) documentation [1,2].

In this study, image processing included following steps: 1) resampling: images were resampled to  $1.0 \times 1.0 \times 1.0$  mm using appropriate interpolation method (B-spline interpolation for images and nearest neighbor for masks); 2) grey level normalization and discretization: VOIs were normalized and discretized to a fixed bin width of 16.

## **Supplementary figures**

### **Supplementary figure S1. An example of apical basal muscle bundle.**

An example of apical-basal muscle bundle that is hard to distinguish from papillary muscle at short-axis cine images in a 59 years old male HCM patient. **(a)** Long axis 2 chamber view at end-diastole of this patient, apical-basal muscle bundle was denoted with white arrow. **(b)** short axis view at the end diastole, from top left (basal) to down right (apical), the apical-basal muscle bundle was denoted with a white triangle, in the short axis view, this muscle bundle is easily confused with papillary muscle.

### **Supplementary figure S2. Comparison of models using calibration curves.**

Calibration curves for different models were plotted, (a) showed calibration curves for detection task with MYO group; (b) showed calibration curves for differentiation task with MYO+PM group.

## Supplementary Figure S1.

(a) Long axis 2 chamber at end diastole

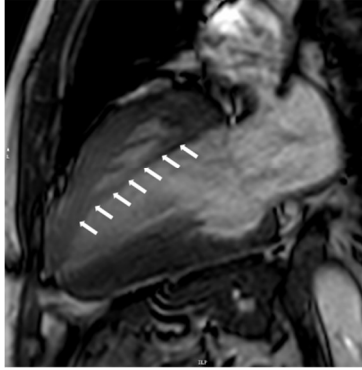

(b) Short axis at end diastole from base to apex

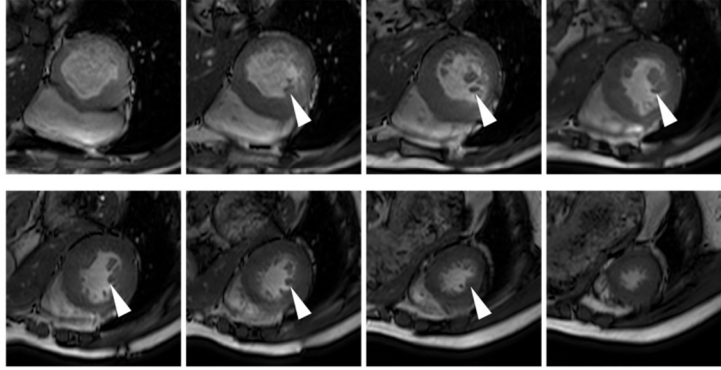

Supplementary Figure S2.

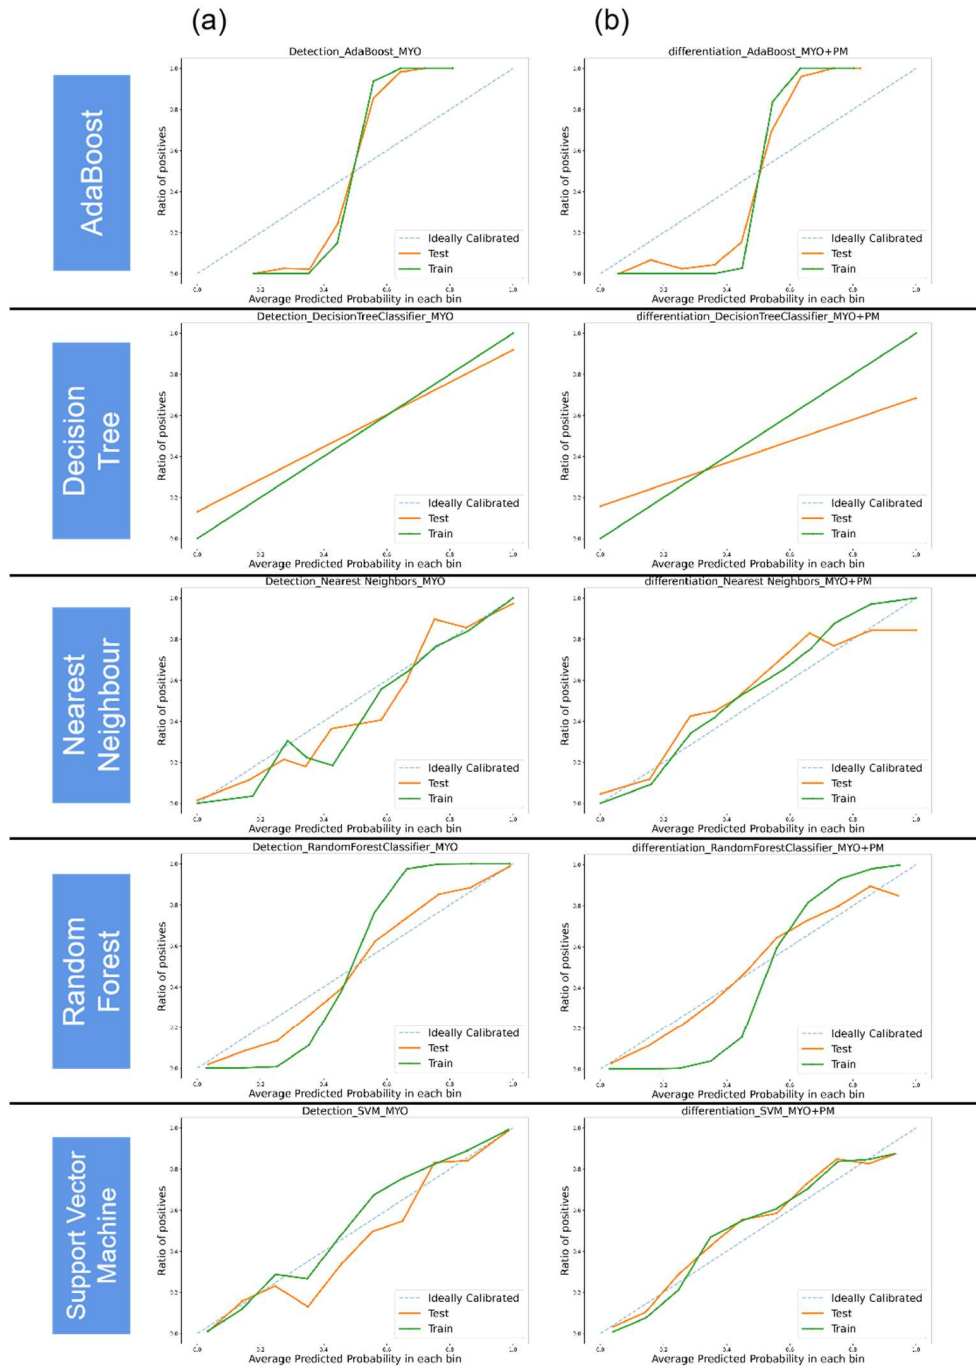

**Supplementary Table S1.** Full list of extracted features.

| VOI | Filter                                                          | Type       |       | Number                | Total |
|-----|-----------------------------------------------------------------|------------|-------|-----------------------|-------|
| MYO | Original                                                        | Shape      |       | 14                    | 1316  |
|     | Original: 1<br>LOG: 4<br>Wavelet: 8<br>Gradient: 1<br>Total: 14 | Firstorder |       | 18×14 (Total Filters) |       |
|     |                                                                 | Texture    | NGTDM | 5×14 (Total Filters)  |       |
|     |                                                                 |            | GLCM  | 24×14 (Total Filters) |       |
|     |                                                                 |            | GLDM  | 14×14 (Total Filters) |       |
|     |                                                                 |            | GLRLM | 16×14 (Total Filters) |       |
|     |                                                                 |            | GLSZM | 16×14 (Total Filters) |       |
| PM  | Original                                                        | Shape      |       | 14                    | 1316  |
|     | Original: 1<br>LOG: 4<br>Wavelet: 8<br>Gradient: 1<br>Total: 14 | Firstorder |       | 18×14 (Total Filters) |       |
|     |                                                                 | Texture    | NGTDM | 5×14 (Total Filters)  |       |
|     |                                                                 |            | GLCM  | 24×14 (Total Filters) |       |
|     |                                                                 |            | GLDM  | 14×14 (Total Filters) |       |
|     |                                                                 |            | GLRLM | 16×14 (Total Filters) |       |
|     |                                                                 |            | GLSZM | 16×14 (Total Filters) |       |

GLCM: gray level co-occurrence matrix; GLDM: gray level dependence matrix; GLRLM : gray level run length matrix; GLSZM: gray level size zone matrix; LOG: Laplace of Gaussian; NGTDM: Neighboring gray tone difference matrix.

**Supplementary Table S2.** Full list of features ranked using Boruta method for detection task.

|        | MYO (N = 28)                           | Importan<br>ce <sup>#</sup> | PM (N = 32)                         | Importan<br>ce <sup>#</sup> |
|--------|----------------------------------------|-----------------------------|-------------------------------------|-----------------------------|
| 1      | wavelet-LHL_glcml_Correlation          | 54.9                        | original_shape_Maximum2DDiameterRow | 1.1                         |
| 2      | original_shape_Sphericity              | 11.0                        | wavelet-HLH_glcml_MCC               | 0.9                         |
| 3      | wavelet-HHH_firstorder_Median          | 9.8                         | wavelet-HHH_firstorder_Uniformity   | 0.8                         |
| 4      | wavelet-LHH_firstorder_Energy          | 4.4                         | wavelet-HHH_glcml_SumEntropy        | 0.4                         |
| 5      | wavelet-LHH_firstorder_Kurtosis        | 1.9                         | wavelet-LHH_glcml_ClusterShade      | 0.4                         |
| 6      | log-sigma-2-0-mm-3D_glcml_ClusterShade | 1.5                         | wavelet-LLH_ngtdm_Contrast          | 0.3                         |
| 7      | wavelet-LLH_glrml_RunEntropy           | 1.3                         | wavelet-HLL_glcml_Correlation       | 0.3                         |
| 8      | wavelet-LHL_glcml_Imc2                 | 0.8                         | original_shape_Flatness             | 0.3                         |
| 9      | wavelet-HLL_glcml_InverseVariance      | 0.6                         | wavelet-LHL_glcml_Imc1              | 0.2                         |
| 1<br>0 | wavelet-HLL_firstorder_Maximum         | 0.4                         | wavelet-LHH_ngtdm_Strength          | 0.2                         |
| 1      | wavelet-HHL_ngtdm_Contrast             | 0.3                         | wavelet-HLH_firstorder_Uniformity   | 0.1                         |

|   |                                                                   |     |                                                          |      |
|---|-------------------------------------------------------------------|-----|----------------------------------------------------------|------|
| 1 |                                                                   |     |                                                          |      |
| 1 |                                                                   |     |                                                          |      |
| 2 | log-sigma-2-0-mm-3D_glcm_Correlation                              | 0.3 | gradient_firstorder_Minimum                              | 0.1  |
| 1 |                                                                   |     |                                                          |      |
| 3 | gradient_glcm_Correlation                                         | 0.2 | wavelet-LHL_firstorder_Kurtosis                          | 0.1  |
| 1 |                                                                   |     |                                                          |      |
| 4 | wavelet-HLL_glcm_Correlation                                      | 0.2 | wavelet-HHH_glszm_GrayLevelNonUniformityNormal<br>alized | 0.1  |
| 1 |                                                                   |     |                                                          |      |
| 5 | wavelet-LLH_ngtdm_Strength                                        | 0.2 | original_shape_Elongation                                | 0.1  |
| 1 |                                                                   |     |                                                          |      |
| 6 | wavelet-LHH_glcm_ClusterShade                                     | 0.2 | wavelet-HHL_firstorder_Kurtosis                          | 0.1  |
| 1 |                                                                   |     |                                                          |      |
| 7 | wavelet-LLH_glcm_Contrast                                         | 0.2 | wavelet-HHH_glszm_GrayLevelNonUniformity                 | 0.1  |
| 1 | log-sigma-2-0-mm-3D_gldm_LargeDependenceHighGray<br>LevelEmphasis | 0.2 | wavelet-HLH_firstorder_Kurtosis                          | 0.1  |
| 8 |                                                                   |     |                                                          |      |
| 1 | original_shape_Flatness                                           | 0.2 | wavelet-HHL_gldm_DependenceNonUniformityN                | <0.1 |



|   |  |                                          |      |                                                      |      |
|---|--|------------------------------------------|------|------------------------------------------------------|------|
| 9 |  |                                          |      | ormalized                                            |      |
| 2 |  |                                          |      |                                                      |      |
| 0 |  | wavelet-LHH_glszm_GrayLevelNonUniformity | <0.1 | wavelet-HLH_firstorder_Mean                          | <0.1 |
| 2 |  |                                          |      |                                                      |      |
| 1 |  | wavelet-HHL_glcm_MCC                     | <0.1 | wavelet-HHL_ngtdm_Contrast                           | <0.1 |
| 2 |  |                                          |      |                                                      |      |
| 2 |  | wavelet-LLH_firstorder_Mean              | <0.1 | wavelet-LHL_glszm_ZoneEntropy                        | <0.1 |
| 2 |  |                                          |      |                                                      |      |
| 3 |  | wavelet-HHL_glcm_InverseVariance         | <0.1 | wavelet-HHL_glcm_ClusterShade                        | <0.1 |
| 2 |  |                                          |      |                                                      |      |
| 4 |  | wavelet-LHL_glcm_ClusterShade            | <0.1 | wavelet-LLH_glszm_LargeAreaLowGrayLevelEmphasis      | <0.1 |
| 2 |  |                                          |      |                                                      |      |
| 5 |  | wavelet-HLH_firstorder_Minimum           | <0.1 | wavelet-LHL_gldm_SmallDependenceLowGrayLevelEmphasis | <0.1 |
| 2 |  |                                          |      |                                                      |      |
| 6 |  | wavelet-HLL_glcm_Imc2                    | <0.1 | wavelet-LHH_gldm_DependenceNonUniformityNormalized   | <0.1 |
| 2 |  |                                          |      |                                                      |      |
|   |  | original_firstorder_Maximum              | <0.1 | wavelet-LLH_glcm_Correlation                         | <0.1 |

|   |                            |      |                                            |      |
|---|----------------------------|------|--------------------------------------------|------|
| 7 |                            |      |                                            |      |
| 2 | wavelet-HHH_ngtdm_Strength | <0.1 | wavelet-HHH_glszm_SizeZoneNonUniformityNor | <0.1 |
| 8 |                            |      | malized                                    |      |
| 2 |                            |      | wavelet-HHL_glcml_Correlation              | <0.1 |
| 9 |                            |      |                                            |      |
| 3 |                            |      | wavelet-LHL_firstorder_Skewness            | <0.1 |
| 0 |                            |      |                                            |      |
| 3 |                            |      | wavelet-HHH_firstorder_Maximum             | <0.1 |
| 1 |                            |      |                                            |      |
| 3 |                            |      | wavelet-LLH_glcml_Idmn                     | <0.1 |
| 2 |                            |      |                                            |      |

---

# The maximal shadow feature importance is 0.2.

GLCM: gray level co-occurrence matrix; GLDM: gray level dependence matrix; GLRLM : gray level run length matrix; GLSZM: gray level size zone matrix; LOG: Laplace of Gaussian; NGTDM: Neighboring gray tone difference matrix.

Other abbreviation for specific features could be found in Pyradiomics documentation.

**Supplementary Table S3.** Full list of features ranked using Boruta method for differentiation task.

|    | MYO (N = 8)                                        | Importance <sup>#</sup> | PM (N = 12)                             | Importance <sup>#</sup> |
|----|----------------------------------------------------|-------------------------|-----------------------------------------|-------------------------|
| 1  | gradient_glcml_Correlation                         | 37.5                    | original_shape_Maximum2DDiameterSlice   | 10.4                    |
| 2  | original_shape_Sphericity                          | 4.9                     | log-sigma-5-0-mm-3D_firstorder_Kurtosis | 3.6                     |
| 3  | original_shape_Elongation                          | 3.5                     | original_glszm_ZoneEntropy              | 3.2                     |
| 4  | wavelet-LHL_glcml_Imc1                             | 3.0                     | wavelet-HLL_glcml_Imc2                  | 3.0                     |
| 5  | log-sigma-5-0-mm-3D_glszm_ZoneEntropy              | 1.3                     | log-sigma-2-0-mm-3D_glcml_Correlation   | 2.9                     |
| 6  | wavelet-LHH_glcml_MCC                              | 1.2                     | gradient_glcml_Idmn                     | 2.4                     |
| 7  | log-sigma-2-0-mm-3D_firstorder_10Percentile        | 1.0                     | wavelet-HHL_glcml_Correlation           | 2.0                     |
| 8  | wavelet-LHH_glszm_GrayLevelNonUniformityNormalized | 0.7                     | log-sigma-3-0-mm-3D_glcml_Imc1          | 1.3                     |
| 9  |                                                    |                         | wavelet-LLH_glcml_MCC                   | 0.8                     |
| 10 |                                                    |                         | wavelet-HLH_glcml_MCC                   | 0.7                     |
| 11 |                                                    |                         | gradient_firstorder_Kurtosis            | 0.7                     |
| 12 |                                                    |                         | original_firstorder_Kurtosis            | 0.5                     |

---

# The maximal shadow feature importance is 0.9.

GLCM: gray level co-occurrence matrix; GLDM: gray level dependence matrix; GLRLM : gray level run length matrix; GLSZM: gray level size zone matrix; LOG: Laplace of Gaussian; NGTDM: Neighboring gray tone difference matrix.

Other abbreviation for specific features could be found in Pyradiomics documentation.

## Reference:

- [1] A. Zwanenburg, M. Vallières, M.A. Abdalah, H.J.W.L. Aerts, V. Andrearczyk, A. Apte, S. Ashrafinia, S. Bakas, R.J. Beukinga, R. Boellaard, M. Bogowicz, L. Boldrini, I. Buvat, G.J.R. Cook, C. Davatzikos, A. Depeursinge, M.-C. Desserot, N. Dinapoli, C.V. Dinh, S. Echegaray, I. El Naqa, A.Y. Fedorov, R. Gatta, R.J. Gillies, V. Goh, M. Götz, M. Guckenberger, S.M. Ha, M. Hatt, F. Isensee, P. Lambin, S. Leger, R.T.H. Leijenaar, J. Lenkiewicz, F. Lippert, A. Losnegård, K.H. Maier-Hein, O. Morin, H. Müller, S. Napel, C. Nioche, F. Orlhac, S. Pati, E.A.G. Pfaehler, A. Rahmim, A.U.K. Rao, J. Scherer, M.M. Siddique, N.M. Sijtsema, J. Socarras Fernandez, E. Spezi, R.J.H.M. Steenbakkers, S. Tanadini-Lang, D. Thorwarth, E.G.C. Troost, T. Upadhaya, V. Valentini, L.V. van Dijk, J. van Griethuysen, F.H.P. van Velden, P. Whybra, C. Richter, S. Löck, The Image Biomarker Standardization Initiative: Standardized Quantitative Radiomics for High-Throughput Image-based Phenotyping, *Radiology*. 295 (2020) 328–338. <https://doi.org/10.1148/radiol.2020191145>.
- [2] J.J.M. van Griethuysen, A. Fedorov, C. Parmar, A. Hosny, N. Aucoin, V. Narayan, R.G.H. Beets-Tan, J.-C. Fillion-Robin, S. Pieper, H.J.W.L. Aerts, Computational Radiomics System to Decode the Radiographic Phenotype, *Cancer Res.* 77 (2017) e104–e107. <https://doi.org/10.1158/0008-5472.CAN-17-0339>.
